# Supplementary material for: Is rehabilitation effective in preventing decreased functional status after community-acquired pneumonia in elderly patients? Results from a multicentre, retrospective observational study
Source: HighWire-hosted journal article supplement (doi:10.1136/bmjopen-2021-051307), 2022-09-01
Supplement: bmjopen-2021-051307supp001_data_supplement.pdf [file bmjopen-2021-051307supp001_data_supplement.pdf]

**Is rehabilitation effective in preventing decreased functional status after community-acquired pneumonia in elderly patients – result from a multicenter retrospective observational study**

Running title: Functional status after pneumonia

Hao Chen<sup>1</sup>, Yu Hara<sup>1</sup>, Nobuyuki Horita<sup>1</sup>, Yusuke Saigusa<sup>3</sup>, Yoshihiro Hirai<sup>2</sup>, Takeshi Kaneko<sup>1</sup>

<sup>1</sup> Department of Respiratory Medicine, Yokohama City University Hospital, Yokohama, Japan

<sup>2</sup> Department of Respiratory Medicine, Kanto Rosai Hospital, Kawasaki, Japan

<sup>3</sup> Department of Biostatistics, Yokohama City University Graduate School of Medicine, Yokohama, Japan

Corresponding author: Hao Chen

Department of Respiratory Medicine, Yokohama City University Hospital, 3-9 Fukuura,

Kanazawa, Yokohama 236-0004, Japan

E-mail: chinsmd@gmail.com

Tel: 045-352-7962; Fax: 045-352-7963

**Supplementary Tables**

Table S1 Detail information of complications in excluded patients

| Complications               | No. patients | Frequency |
|-----------------------------|--------------|-----------|
| heart failure               | 39           | 39.8%     |
| Lumbar compression fracture | 19           | 19.4%     |
| femoral fracture            | 11           | 11.2%     |
| acute myocardial infarction | 6            | 6.1%      |
| cerebral infarction         | 5            | 5.1%      |
| Others (tumors, et.al.)     | 18           | 18.4%     |

Table S2. Distribution of the causative microorganisms in patients with maintained and decreased group from sputum and blood cultures.

| Microorganisms                  | Total | Maintained group | Decreased group |
|---------------------------------|-------|------------------|-----------------|
| <i>Streptococcus pneumoniae</i> | 71    | 58               | 13              |
| <i>Klebsiella pneumoniae</i>    | 43    | 29               | 14              |
| <i>Staphylococcus aureus</i>    | 38    | 28               | 10              |
| <i>Pseudomonas aerogenes</i>    | 27    | 20               | 7               |
| <i>Escherichia coli</i>         | 19    | 13               | 6               |
| <i>Haemophilus influenzae</i>   | 19    | 12               | 7               |
| <i>Moraxella Branhamel</i>      | 13    | 9                | 4               |
| <i>Klebsiella oxytoca</i>       | 9     | 7                | 2               |
| <i>Stenotrophomonas</i>         | 8     | 7                | 1               |
| <i>Raoultella planticola</i>    | 7     | 6                | 1               |
| <i>Streptococcus agalactiae</i> | 6     | 5                | 1               |
| <i>Enterobacter aerogenes</i>   | 5     | 3                | 2               |
| <i>Enterobacter cloacae</i>     | 4     | 3                | 1               |
| <i>Pseudomonas fluorescens</i>  | 4     | 2                | 2               |
| normal flora                    | 222   | 168              | 54              |
| Others                          | 6     | 4                | 2               |
| Mixed                           | 11    | 8                | 3               |
| Not tested                      | 26    | 18               | 8               |

Table S3 Multivariable analysis of risk factors for mortality in CAP

| Risk factors    | Mortality |       |       |         |
|-----------------|-----------|-------|-------|---------|
|                 | OR        | 95%CI |       | p value |
| PSI score       | 131.2     | 21.2  | 812.1 | <0.01   |
| FS at admission | 5.3       | 2.2   | 12.6  | <0.01   |
| BMI             | 0.09      | 0.01  | 1.58  | 0.09    |
| Age             | 1.01      | 0.98  | 1.06  | 0.38    |

CAP, community acquired pneumonia; PSI, Pneumonia Severity Index; FS: functional status; BMI, body mass index; OR, odds ratio; CI: confidence interval

Table S4 Multivariable analysis of risk factor for CAP patients above mean hospitalization expenses

| Risk factor          | High cost |           |         |
|----------------------|-----------|-----------|---------|
|                      | OR        | 95%CI     | p value |
| Aspiration pneumonia | 2.06      | 1.16 3.36 | 0.01    |
| BMI                  | 4.83      | 1.05 22.3 | 0.04    |
| PSI Score            | 0.29      | 0.07 1.14 | 0.07    |

CAP, community acquired pneumonia; BMI, body mass index; PSI, Pneumonia Severity Index; OR, odds ratio; CI: confidence interval
